# Supplementary material for: Highly efficient and stable broadband near-infrared-emitting lead-free metal halide double perovskites
Source: Royal Society of Chemistry journal article supplement (doi:10.1039/d1tc02867g), 2021-01-01
Supplement: d1tc02867g2.pdf [file d1tc02867g2.pdf]

Supporting Information for:

**Highly efficient and stable broadband near-infrared-emitting lead-free metal halide double perovskites**

Guangting Xiong<sup>a</sup>, Lifang Yuan<sup>a, b</sup>, Yahong Jin<sup>a, \*</sup>, Haoyi Wu<sup>a</sup>, Bingyan Qu<sup>e</sup>,  
Zhenzhang Li<sup>f</sup>, Guifang Ju<sup>a</sup>, Li Chen<sup>a</sup>, Shihe Yang<sup>c, d, \*</sup>, and Yihua Hu<sup>a, \*</sup>

<sup>a</sup> School of Physics and Optoelectronic Engineering, Guangdong University of Technology, Waihuan Xi Road, No. 100, Guangzhou 510006, PR China.

<sup>b</sup> Department Experimental Teaching Department, Guangdong University of Technology, Waihuan Xi Road, No. 100, Guangzhou 510006, PR China.

<sup>c</sup> Institute of Biomedical Engineering, Shenzhen Bay Laboratory, Gaoke International Innovation Center, Guangqiao Road, Guangming District, Shenzhen., PR China.

<sup>d</sup> Guangdong Key Lab of Nano-Micro Material Research, School of Chemical Biology and Biotechnology, Shenzhen Graduate School, Peking University, Shenzhen 518055, PR China.

<sup>e</sup> School of Materials Science and Engineering, Hefei University of Technology, Hefei, Anhui 230009, PR China.

<sup>f</sup> Guangdong Polytechnic Normal University, College of Mathematics and Systems Science, Zhongshan Avenue West, Tianhe District, Guangzhou 510665, PR China.

\*Corresponding author. E-mail: yhj@gdut.edu.cn; chsyang@pku.edu.cn; huyh@gdut.edu.cn

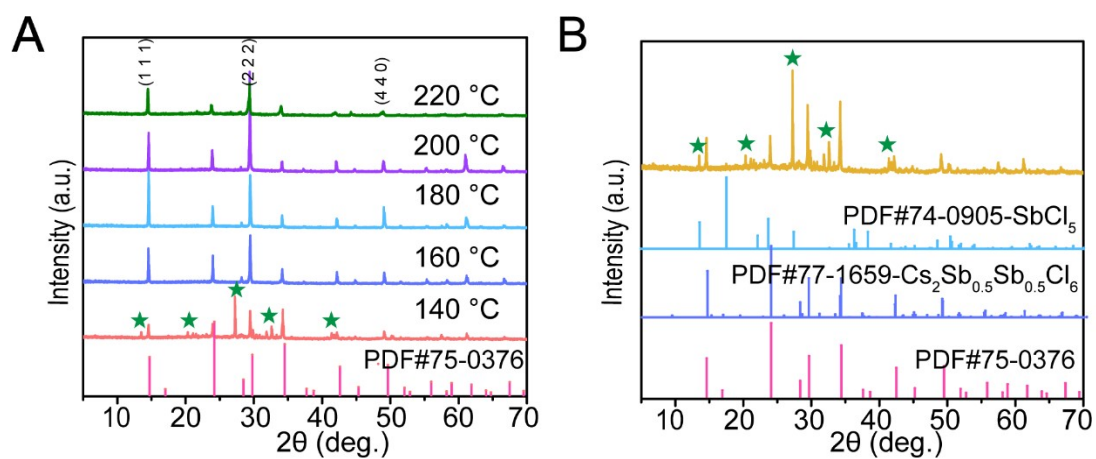

**Fig. S1.** A) XRD patterns  $\text{Cs}_2\text{SnCl}_4\text{Br}_2:0.02\text{Sb}$  prepared at different synthesis temperatures and the standard XRD pattern of  $\text{Cs}_2\text{SnCl}_6$ . B) XRD patterns  $\text{Cs}_2\text{SnCl}_4\text{Br}_2:0.02\text{Sb}$  prepared at 140 °C and the standard XRD patterns of  $\text{Cs}_2\text{Sb}_{0.5}\text{Sb}_{0.5}\text{Cl}_6$  and  $\text{SbCl}_5$ .

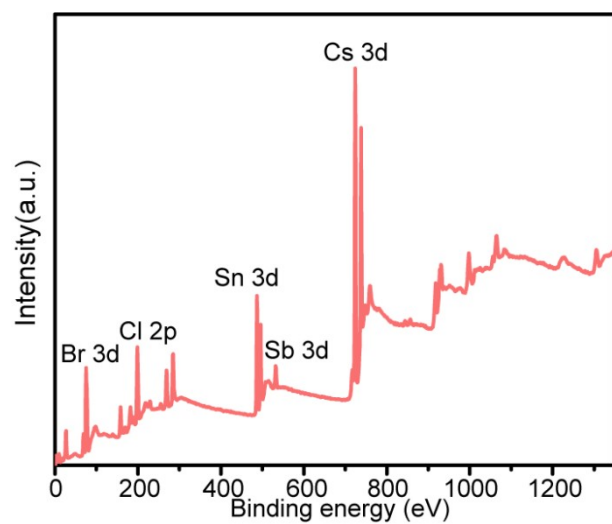

**Fig. S2.** XPS survey spectrum of sample  $\text{Cs}_2\text{SnCl}_4\text{Br}_2$ : Sb.

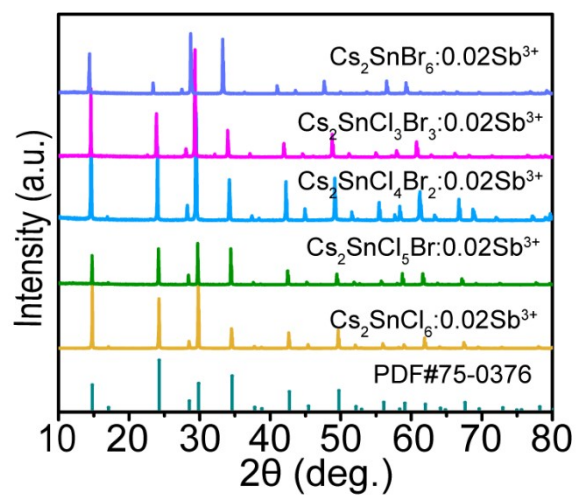

**Fig. S3.** XRD patterns  $\text{Cs}_2\text{SnCl}_x\text{Br}_y: 0.02\text{Sb}$  ( $x+y=6$ ) and the standard XRD pattern of  $\text{Cs}_2\text{SnCl}_6$  (PDF#75-0376).

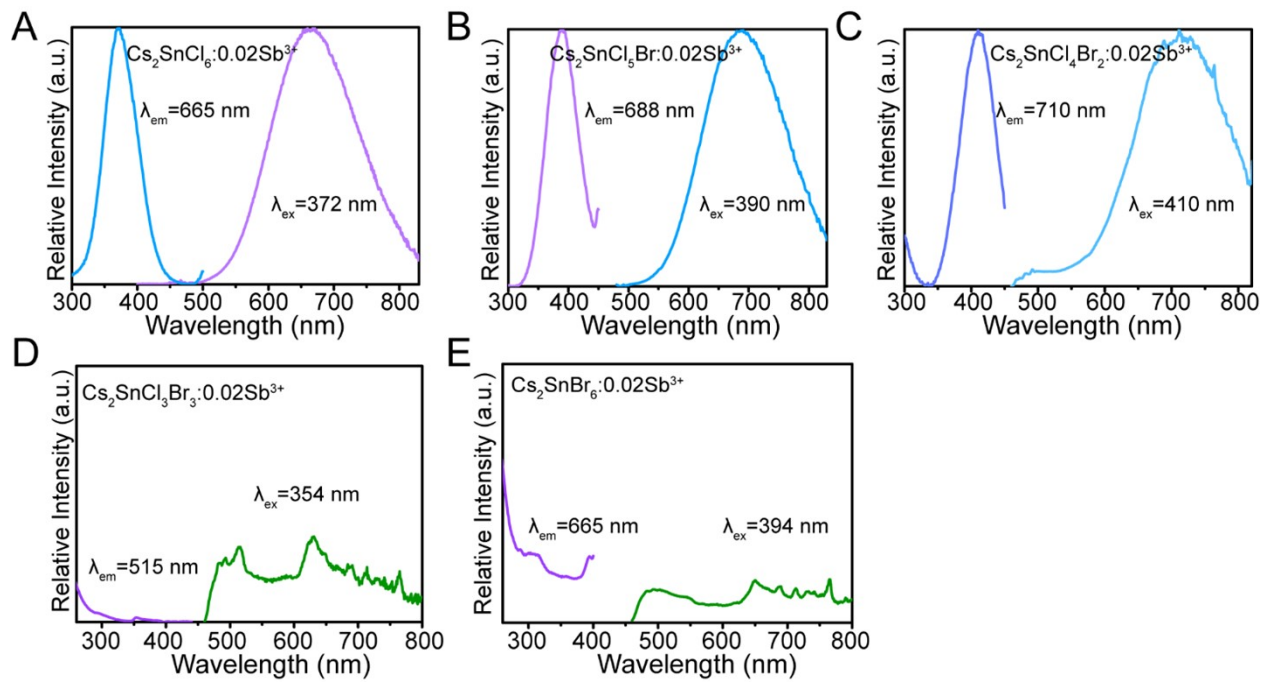

**Fig. S4.** Excitation and emission spectra of the as-synthesized  $\text{Cs}_2\text{SnCl}_x\text{Br}_y:0.02\text{Sb}$  ( $x+y=6$ ) phosphors.

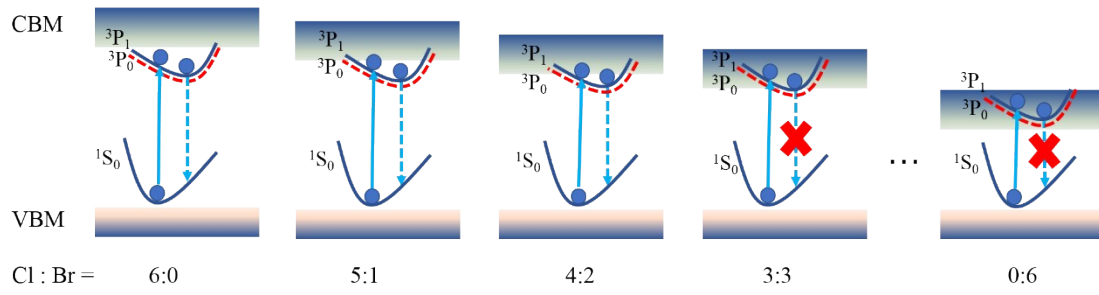

**Fig. S5.** The bandgap and energy level diagram of  $\text{Sb}^{3+}$ -doped  $\text{Cs}_2\text{SnCl}_x\text{Br}_y$  ( $x+y=6$ ).

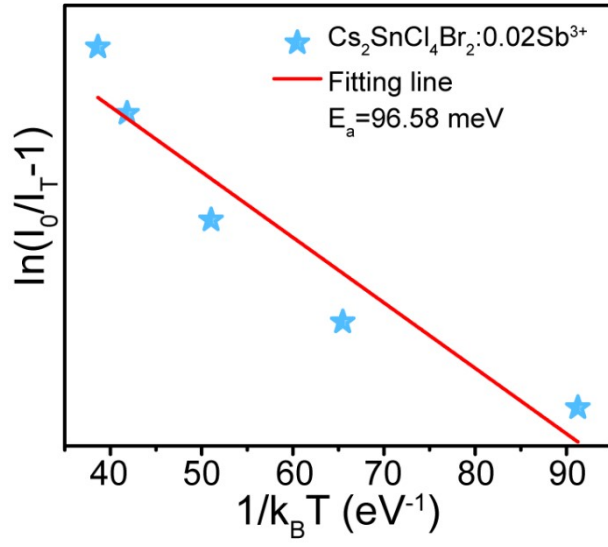

**Fig. S6.** The relationships between  $\ln(I_0/I_T - 1)$  versus  $1/k_B T$  ( $T=77\text{--}300 \text{ K}$ ) and the linear fitting result.

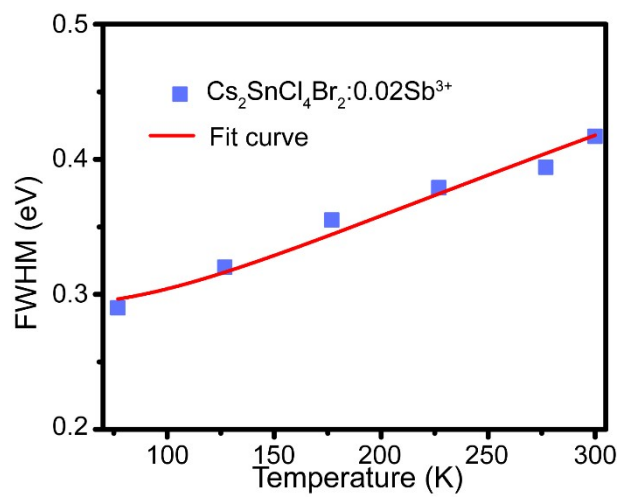

**Fig. S7.** Temperature dependence of PL FWHM of  $\text{Cs}_2\text{SnCl}_4\text{Br}_2: 0.02\text{Sb}^{3+}$ .



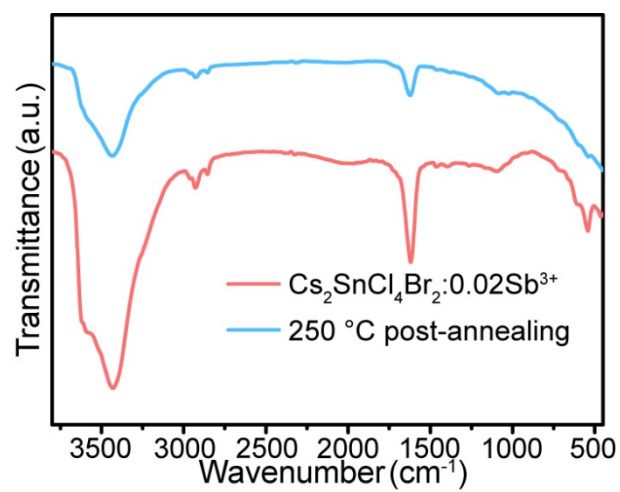

Fig. S8. FT-IR of the sample Cs<sub>2</sub>SnCl<sub>4</sub>Br<sub>2</sub>: 0.02Sb before and after post-annealing at 250 °C.

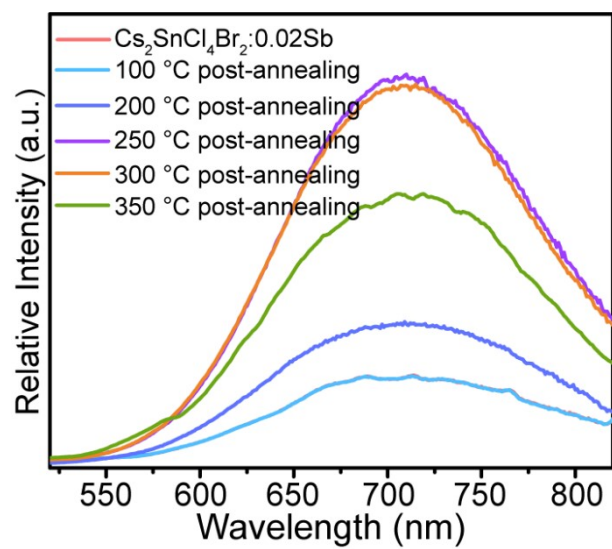

**Fig. S9.** Emission spectra of  $\text{Cs}_2\text{SnCl}_4\text{Br}_2:0.02\text{Sb}$  on post-annealing temperature.

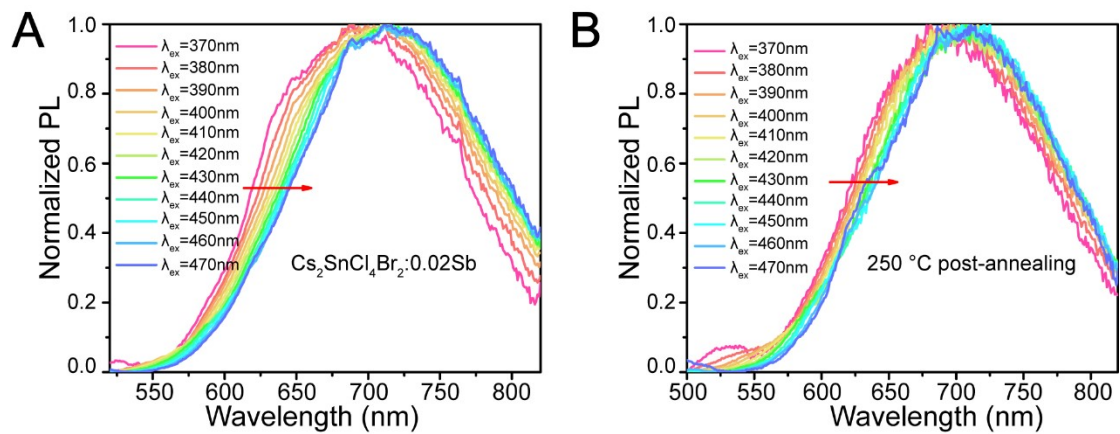

**Fig. S10.** Emission spectra of the original (A) and post-annealed (at 250 °C) (B) sample  $\text{Cs}_2\text{SnCl}_4\text{Br}_2:0.02\text{Sb}$  under different excitations varied from 370 to 470 nm.

**Table S1. The calculated crystallographic data and refinement parameters.**

| <b>Atoms</b> | <b>Sites</b> | <b>x</b>      | <b>y</b>      | <b>z</b>      | <b>Frac.</b>  |
|--------------|--------------|---------------|---------------|---------------|---------------|
| <b>Cs1</b>   | <b>8c</b>    | <b>0.2500</b> | <b>0.2500</b> | <b>0.2500</b> | <b>1.0000</b> |
| <b>Sn1</b>   | <b>4a</b>    | <b>0.0000</b> | <b>0.0000</b> | <b>0.0000</b> | <b>1.0000</b> |
| <b>Cl1</b>   | <b>24e</b>   | <b>0.2388</b> | <b>0.0000</b> | <b>0.0000</b> | <b>0.7174</b> |
| <b>Br1</b>   | <b>24e</b>   | <b>0.2388</b> | <b>0.0000</b> | <b>0.0000</b> | <b>0.3840</b> |

**Crystal system: centric F-centered cubic**

**Space group: Fm-3m**

**Z=4**

**Lattice parameters: a=b=c=10.4663**

**Reliable factors:  $R_{wp}=9.42\%$ ,  $R_p=6.67\%$ ,  $\chi^2=3.213$**

**Table S2. The chemical composition data of Cs<sub>2</sub>SnCl<sub>4</sub>Br<sub>2</sub>: 0.02Sb measured by EDS.**

| <b>Cs (%)</b>                                                            | <b>Sn (%)</b> | <b>Cl (%)</b> | <b>Br (%)</b> | <b>Sb (%)</b> | <b>Total atomic (%)</b> |
|--------------------------------------------------------------------------|---------------|---------------|---------------|---------------|-------------------------|
| <b>25.85</b>                                                             | <b>11.21</b>  | <b>49.94</b>  | <b>12.66</b>  | <b>0.33</b>   | <b>100</b>              |
| <b>Theoretical atomic ratio: Cs: Sn: Cl: Br: Sb =2: 1: 4: 2: 0.02</b>    |               |               |               |               |                         |
| <b>Experimental ratio: Cs: Sn: Cl: Br: Sb =2.31: 1: 4.45: 1.13: 0.03</b> |               |               |               |               |                         |

**Table S3. The summary of PLQY and FWHM of the reported NIR halide perovskites.**

|                                                        | Samples                                             | Emission peaks | FWHM | PLQY         | Years              |
|--------------------------------------------------------|-----------------------------------------------------|----------------|------|--------------|--------------------|
|                                                        |                                                     | [nm]           | [nm] | (%)          |                    |
| Pb-<br>based                                           | $\text{CH}_3\text{NH}_3\text{PbI}_3$                | 765            | 50   | 17           | 2014 <sup>1</sup>  |
|                                                        | $\text{CH}_3\text{NH}_3\text{PbI}_{3-a}\text{Cl}_a$ | 765            | 50   | 30           |                    |
|                                                        | FAPbI <sub>3</sub>                                  | 770-780        | 45   | >70          | 2017 <sup>2</sup>  |
|                                                        | CsPbI <sub>3</sub>                                  | 695            | 50   | 65           | 2017 <sup>3</sup>  |
|                                                        | $\text{CsSn}_x\text{Pb}_{1-x}\text{I}_3$            | 700-850        | 100  | 0.3-3        | 2017 <sup>4</sup>  |
|                                                        | $\text{Cs}_x\text{FA}_{1-x}\text{PbI}_3$            | 650-800        | 50   | 60-70        | 2018 <sup>5</sup>  |
|                                                        | $\text{PEA}_2\text{Pb}_{1-x}\text{Sn}_x\text{I}_4$  | 710            | 154  | 6            | 2019 <sup>6</sup>  |
|                                                        | $\text{CsSn}_x\text{Pb}_{1-x}\text{I}_3$ : Na       | 830            | 100  | 28           | 2020 <sup>7</sup>  |
|                                                        | MAPbI <sub>3</sub>                                  | 774            | 50   | ---          | 2020 <sup>8</sup>  |
| Pb-free                                                | CsSnI <sub>3</sub>                                  | 950            | 80   | 0.06         | 2016 <sup>9</sup>  |
|                                                        | MASnI <sub>3</sub>                                  | 870            | 85   | ---          | 2017 <sup>10</sup> |
|                                                        | {en}MASnI <sub>3</sub>                              | 890            | 100  | ---          |                    |
|                                                        | FASnI <sub>3</sub>                                  | 880            | 120  | ---          | 2019 <sup>11</sup> |
|                                                        | Cs <sub>2</sub> AgInCl <sub>6</sub> :               | 996            | 50   | 0.2          | 2019 <sup>12</sup> |
|                                                        | Yb/Er                                               | 1537           | 60   | 0.02         |                    |
|                                                        | Cs <sub>3</sub> Sb <sub>2</sub> I <sub>9</sub>      | 750            | 120  | ---          | 2019 <sup>13</sup> |
|                                                        | Cs <sub>2</sub> AgInCl <sub>6</sub> : Bi/Er         | 1540           | 50   | ---          | 2020 <sup>14</sup> |
|                                                        | Cs <sub>2</sub> AgInCl <sub>6</sub> : Bi/Yb         | 994            | 60   | ---          |                    |
| Cs <sub>2</sub> SnCl <sub>4</sub> Br <sub>2</sub> : Sb | 710                                                 | 164            | 8.11 | This<br>work |                    |

**Table S4 Photoelectric parameters of the NIR-LEDs fabricated using the samples Cs<sub>2</sub>SnCl<sub>4</sub>Br<sub>2</sub>: 0.02Sb with (NIR-LED-1) and without post-annealing (NIR-LED-2).**

| <b>NIR-LEDs</b>  | <b>Current<br/>(mA)</b> | <b>Voltage<br/>(V)</b> | <b>NIR power<br/>(mW)</b> | <b>Photoelectric<br/>efficiency<br/>(%)</b> |
|------------------|-------------------------|------------------------|---------------------------|---------------------------------------------|
| <b>NIR-LED-1</b> | 19.98                   | 2.95                   | 1.925                     | 3.264                                       |
|                  | 29.96                   | 2.971                  | 2.887                     | 3.243                                       |
|                  | 39.97                   | 2.987                  | 3.815                     | 3.195                                       |
|                  | 49.97                   | 3.003                  | 4.696                     | 3.131                                       |
|                  | 59.97                   | 3.015                  | 5.564                     | 3.078                                       |
|                  | 69.98                   | 3.027                  | 6.353                     | 2.999                                       |
|                  | 79.98                   | 3.039                  | 7.16                      | 2.947                                       |
|                  | 89.98                   | 3.05                   | 7.882                     | 2.872                                       |
|                  | 99.99                   | 3.061                  | 8.603                     | 2.811                                       |
|                  | 149.9                   | 3.112                  | 11.76                     | 2.520                                       |
|                  | 199.9                   | 3.159                  | 14.28                     | 2.261                                       |
|                  | 250                     | 3.206                  | 16.13                     | 2.012                                       |
|                  | 299.8                   | 3.25                   | 17.23                     | 1.768                                       |
|                  | <b>NIR-LED-2</b>        | 20                     | 2.945                     | 1.498                                       |
| 29.98            |                         | 2.964                  | 2.261                     | 2.544                                       |
| 39.98            |                         | 2.981                  | 3.005                     | 2.521                                       |
| 49.96            |                         | 2.995                  | 3.713                     | 2.482                                       |
| 59.97            |                         | 3.008                  | 4.396                     | 2.437                                       |
| 69.97            |                         | 3.02                   | 5.06                      | 2.395                                       |
| 79.97            |                         | 3.032                  | 5.725                     | 2.361                                       |
| 89.98            |                         | 3.042                  | 6.328                     | 2.311                                       |
| 99.99            |                         | 3.053                  | 6.97                      | 2.283                                       |
| 149.9            |                         | 3.102                  | 9.706                     | 2.086                                       |
| 199.9            |                         | 3.149                  | 12.05                     | 1.914                                       |
| 250              |                         | 3.194                  | 13.85                     | 1.734                                       |
| 299.9            |                         | 3.239                  | 15.33                     | 1.578                                       |

## References

1. Q. Zhang, S. T. Ha, X. Liu, T. C. Sum, Q. Xiong, Room-temperature near-infrared high-Q perovskite whispering-gallery planar nanolasers. *Nano. Lett.* 14 (2014) 5995-6001.
2. L. Protesescu, S. Yakunin, S. Kumar, J. Bertolotti, N. Masciocchi, A. Guagliardi, M. Grotevent, I. Shorubalko, M. I. Bodnarchuk, Dismantling the "Red Wall" of Colloidal Perovskites: Highly Luminescent Formamidinium and Formamidinium-Cesium Lead Iodide Nanocrystals. *ACS Nano.* 11 (2017) 3119-3134.
3. N. J. L. K. Davis, I. P. a. De, J. Francisco, M. Tabachnyk, J. M. Richter, R. D. Lamboll, E. P. Booker, W. R. R. Florencia, J. T. Griffiths, C. Ducati, S. M, Photon Reabsorption in Mixed  $\text{CsPbCl}_3$ :  $\text{CsPbI}_3$  Perovskite Nanocrystal Films for Light-Emitting Diodes. *J. Phys. Chem. C* 121 (2017) 3790-3796.
4. F. Liu, J. Jiang, C. Ding, Y. Zhang, T. Toyoda, T. S. Ripolles, T. Kamisaka, T. Toyoda, S. Hayase, S. Dai, Q. Shen, Colloidal Synthesis of Air-Stable Alloyed  $\text{CsSn}_{1-x}\text{Pb}_x\text{I}_3$  Perovskite Nanocrystals for Use in Solar Cells, *J. Am. Chem. Soc.* 139 (2017) 16708-16719.
5. A. Hazarika, Q. Zhao, E. A. Gaulding, J. A. Christians, B. Dou, A. R. Marshall, T. Moot, J. J. Berry, J. C. Johnson, J. M. Luther, Perovskite Quantum Dot Photovoltaic Materials beyond the Reach of Thin Films: Full-Range Tuning of A-Site Cation Composition, *ACS Nano.* 12 (2018) 10327-10337.
6. J. Yu, J. Kong, W. Hao, X. Guo, H. He, W. R. Leow, Z. Liu, P. Cai, G. Qian, S. Li, X. Chen, X. Chen, Broadband Extrinsic Self-Trapped Exciton Emission in Sn-



- Doped 2D Lead-Halide Perovskites, *Adv. Mater.* 31 (2019), 1806385.
7. F. Liu, J. Jiang, Y. Zhang, C. Ding, T. Toyoda, S. Hayase, R. Wang, S. Tao, Q. Shen, Near-Infrared Emission from Tin-Lead (Sn-Pb) Alloyed Perovskite Quantum Dots by Sodium Doping, *Angew. Chem.* 132 (2020) 8499-8502.
  8. T. Wang, G. Lian, L. Huang, F. Zhu, D. Cui, Q. Wang, Q. Meng, C. Wong, MAPbI<sub>3</sub> Quasi-Single-Crystal Films Composed of Large-sized Grains with Deep Boundary Fusion for Sensitive Vis-NIR Photodetectors, *ACS Appl. Mater. Interfaces* 12 (2020) 38314-38324.
  9. T. C. Jellicoe, J. M. Richter, H. F. J. Glass, M. Tabachnyk, R. Brady, S. E. Dutton, A. Rao, R. H. Friend, D. Credginton, N. C. Greenham, Synthesis and Optical Properties of Lead-Free Cesium Tin Halide Perovskite Nanocrystals, *J. Am. Chem. Soc.* 138 (2016) 2941-2944.
  10. W. Ke, C. C. Stoumpos, I. Spanopoulos, L. Mao, M. Chen, M. R. Wasielewski, M. G. Kanatzidis, Efficient Lead-Free Solar Cells Based on Hollow {en}MASnI<sub>3</sub> Perovskites, *J. Am. Chem. Soc.* 139 (2017) 14800-14806.
  11. X. Meng, J. Lin, X. Liu, X. He, L. Han, Highly Stable and Efficient FASnI<sub>3</sub>-Based Perovskite Solar Cells by Introducing Hydrogen Bonding, *Adv. Mater.* 31(2019) 1903721.
  12. W. Lee, S. Hong, S. Kim, Colloidal Synthesis of Lead-Free Silver-Indium Double-Perovskite Cs<sub>2</sub>AgInCl<sub>6</sub> Nanocrystals and Their Doping with Lanthanide Ions, *J. Phys. Chem. C* 123 (2019) 2665–2672.
  13. A. Singh, N.-C. Chiu, K. M. Boopathi, Y.-J. Lu, A. Mohapatra, G. Li, Y.-F.

Chen, T.-F. Guo, C.-W. Chu, Lead-Free Antimony-Based Light-Emitting Diodes through the Vapor-Anion-Exchange Method, ACS Appl. Mater. Interfaces 11 (2019) 35088-35094.

14. H. Arfin, J. Kaur, T. Sheikh, S. Chakraborty, A. Nag, Bi<sup>3+</sup>-Er<sup>3+</sup> and Bi<sup>3+</sup>-Yb<sup>3+</sup> Codoped Cs<sub>2</sub>AgInCl<sub>6</sub> Double Perovskite Near Infrared Emitters, Angew. Chem. Int. Ed. 59 (2020) 11307-11311.
